# Supplementary material for: Contributions to local- and regional-scale formaldehyde concentrations
Source: Copernicus journal article supplement (doi:10.5194/acp-19-8363-2019), 2019-07-02
Supplement: Supplementary file 1 [file acp-19-8363-2019-supplement.zip]

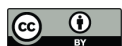

## *Supplement of*

# **Contributions to local- and regional-scale formaldehyde concentrations**

**Lucas A. J. Bastien et al.**

*Correspondence to:* Robert A. Harley ([harley@ce.berkeley.edu](mailto:harley@ce.berkeley.edu))

- [acp-19-8363-2019-supplement-title-page.pdf](#)
- [model-source-code](#)
  - CCTM
    - \* adjoint
    - \* adjutil
    - \* couple
    - \* driver
    - \* hadv
    - \* hdiff
    - \* init
    - \* par
    - \* phot
    - \* util
    - \* vadv
    - \* vdiff
  - ICL
    - \* fixed
    - \* mech
    - \* procan
  - JPROC
    - \* driver
  - PARIO
    - \* PIOGRID.EXT
    - \* PIOVARS.EXT
    - \* alloc\_data\_mod.f
    - \* boundary.f
    - \* get\_read\_map.f

- \* get\_write\_map.f
- \* growbuf.f
- \* gtndxhdv.f
- \* initm3io.f
- \* interpol.f
- \* pinterpb.f
- \* pinterpb\_mod.f
- \* pio\_end.f
- \* pio\_init.f
- \* piomaps\_mod.f
- \* pm3err.f
- \* pm3exit.f
- \* pm3warn.f
- \* prdgrdd.f
- \* pread3.f
- \* pshut3.f
- \* pwrgrdd.f
- \* pwrite3.f
- \* readbndy.f
- \* subdmap.f
- \* wrsubmap.f
- README.txt
- STENEX
  - \* noop\_f90
  - \* se\_snl
- makefile
- supplementary-information.pdf

The copyright of individual parts of the supplement might differ from the CC BY 4.0 License.
